# Supplementary material for: Superconductivity of structurally disordered Y5Ir6Sn18
Source: Royal Society of Chemistry journal article supplement (doi:10.1039/d2dt01353c), 2022-01-01
Supplement: d2dt01353c1.pdf [file d2dt01353c1.pdf]

# Journal Name

## ARTICLE TYPE

Cite this: DOI:00.0000/xxxxxxxxxx

## Superconductivity in structurally disordered $\text{Y}_5\text{Ir}_6\text{Sn}_{18}$

Volodymyr Levytskyi,<sup>a</sup> Wilder Carrillo-Cabrera,<sup>b</sup> Lev Akselrud,<sup>b,c</sup> Bohdan Kundys,<sup>d</sup>  
Andreas Leithe-Jasper<sup>b</sup> and Roman Gumeniuk<sup>\*a</sup>

Received Date

Accepted Date

DOI:00.0000/xxxxxxxxxx

## Supporting Information

**Table S1** Selected interatomic distances  $d$  together with their contractions (-) or elongation (+) in comparison with the sums of atomic radii of the elements (in %) in the crystal structure of  $\text{Y}_5\text{Ir}_6\text{Sn}_{18}$ . (Self-excluding pairs appearing due to the partial site occupancies are not presented here.)

| Atom       | $d, \text{Å}$ | $\frac{d - \sum r_i}{\sum r_i} \times 100\%$ |
|------------|---------------|----------------------------------------------|
| Y1 - 24Sn4 | 3.423(2)      | +6.3 %                                       |
| - 6Ir      | 3.508(1)      | +10.7 %                                      |
| Y2 - 3Sn3  | 2.99(2)       | -7.1 %                                       |
| - 3Sn2     | 3.02(1)       | -6.2 %                                       |
| - 3Ir      | 3.060(4)      | -3.5 %                                       |
| - 6Sn4     | 3.137(4)      | -2.6 %                                       |
| - 3Sn1     | 3.248(5)      | +0.9 %                                       |
| - 6Sn4     | 3.349(4)      | +4.0 %                                       |
| - 3Y2      | 3.784(5)      | +4.5 %                                       |
| Ir - 8Sn4  | 2.658(2)      | -4.0 %                                       |
| - 4Sn1     | 2.762(3)      | -0.3 %                                       |
| - 4Y2      | 3.060(4)      | -3.5 %                                       |
| - 1Y1      | 3.508(1)      | +10.7 %                                      |
| Sn1 - 3Sn1 | 2.421(4)      | -14.1 %                                      |
| - 3Ir      | 2.762(3)      | -0.3 %                                       |
| - 1Sn2     | 3.11(2)       | +10.3 %                                      |
| - 3Y2      | 3.248(5)      | +0.9 %                                       |
| Sn2 - 3Y2  | 3.02(1)       | -6.2 %                                       |
| - 1Sn1     | 3.11(2)       | +10.3 %                                      |
| - 6Sn4     | 3.24(2)       | +14.9 %                                      |
| Sn3 - 2Y2  | 2.99(2)       | -7.1 %                                       |
| - 2Sn4     | 3.14(2)       | +11.3 %                                      |
| Sn4 - 2Ir  | 2.658(2)      | -4.0 %                                       |
| - 1Sn4     | 2.902(2)      | +2.9 %                                       |
| - 1Sn4     | 2.924(2)      | +3.7 %                                       |
| - 2Y2      | 3.137(4)      | -2.6 %                                       |
| - 1Sn3     | 3.14(2)       | +11.3 %                                      |
| - 2Sn4     | 3.162(3)      | +12.1 %                                      |
| - 2Sn2     | 3.24(2)       | +14.9 %                                      |
| - 2Y2*     | 3.349(4)      | +4.0 %                                       |
| - 1Y1      | 3.423(2)      | +6.3 %                                       |

<sup>a</sup> Institut für Experimentelle Physik, TU Bergakademie Freiberg, Leipziger Straße 23, 09596 Freiberg, Germany; E-mail: roman.gumeniuk@physik.tu-freiberg.de

<sup>b</sup> Max-Planck-Institut für Chemische Physik fester Stoffe, Nöthnitzer Straße 40, 01187 Dresden, Germany

<sup>c</sup> Ivan Franko National University of Lviv, Kyryla and Mefodiya Str. 6, UA-79005, Lviv, Ukraine

<sup>d</sup> Institute de Physique et de Chimie des Matériaux de Strasbourg, UMR 7504 CNRS-ULP, 23 rue du Loess, BP 43, F67034 Strasbourg Cedex 2, France

**Table S2** Theoretically optimized atomic coordinates for the idealized  $\text{Y}_5\text{Ir}_6\text{Sn}_{18}$  structure [space group  $F\bar{4}3m$ ,  $a = 13.7706(1)$  Å].

| Atom | Site  | $x$     | $y$ | $z$     |
|------|-------|---------|-----|---------|
| Y1   | $4a$  | 0       | 0   | 0       |
| Y2   | $16e$ | 0.36918 | $x$ | $x$     |
| Ir   | $24f$ | 0.74551 | 0   | 0       |
| Sn1  | $4c$  | 1/4     | 1/4 | 1/4     |
| Sn2  | $4d$  | 3/4     | 3/4 | 3/4     |
| Sn3  | $16e$ | 0.58733 | $x$ | $x$     |
| Sn4  | $48h$ | 0.17615 | $x$ | 0.98835 |

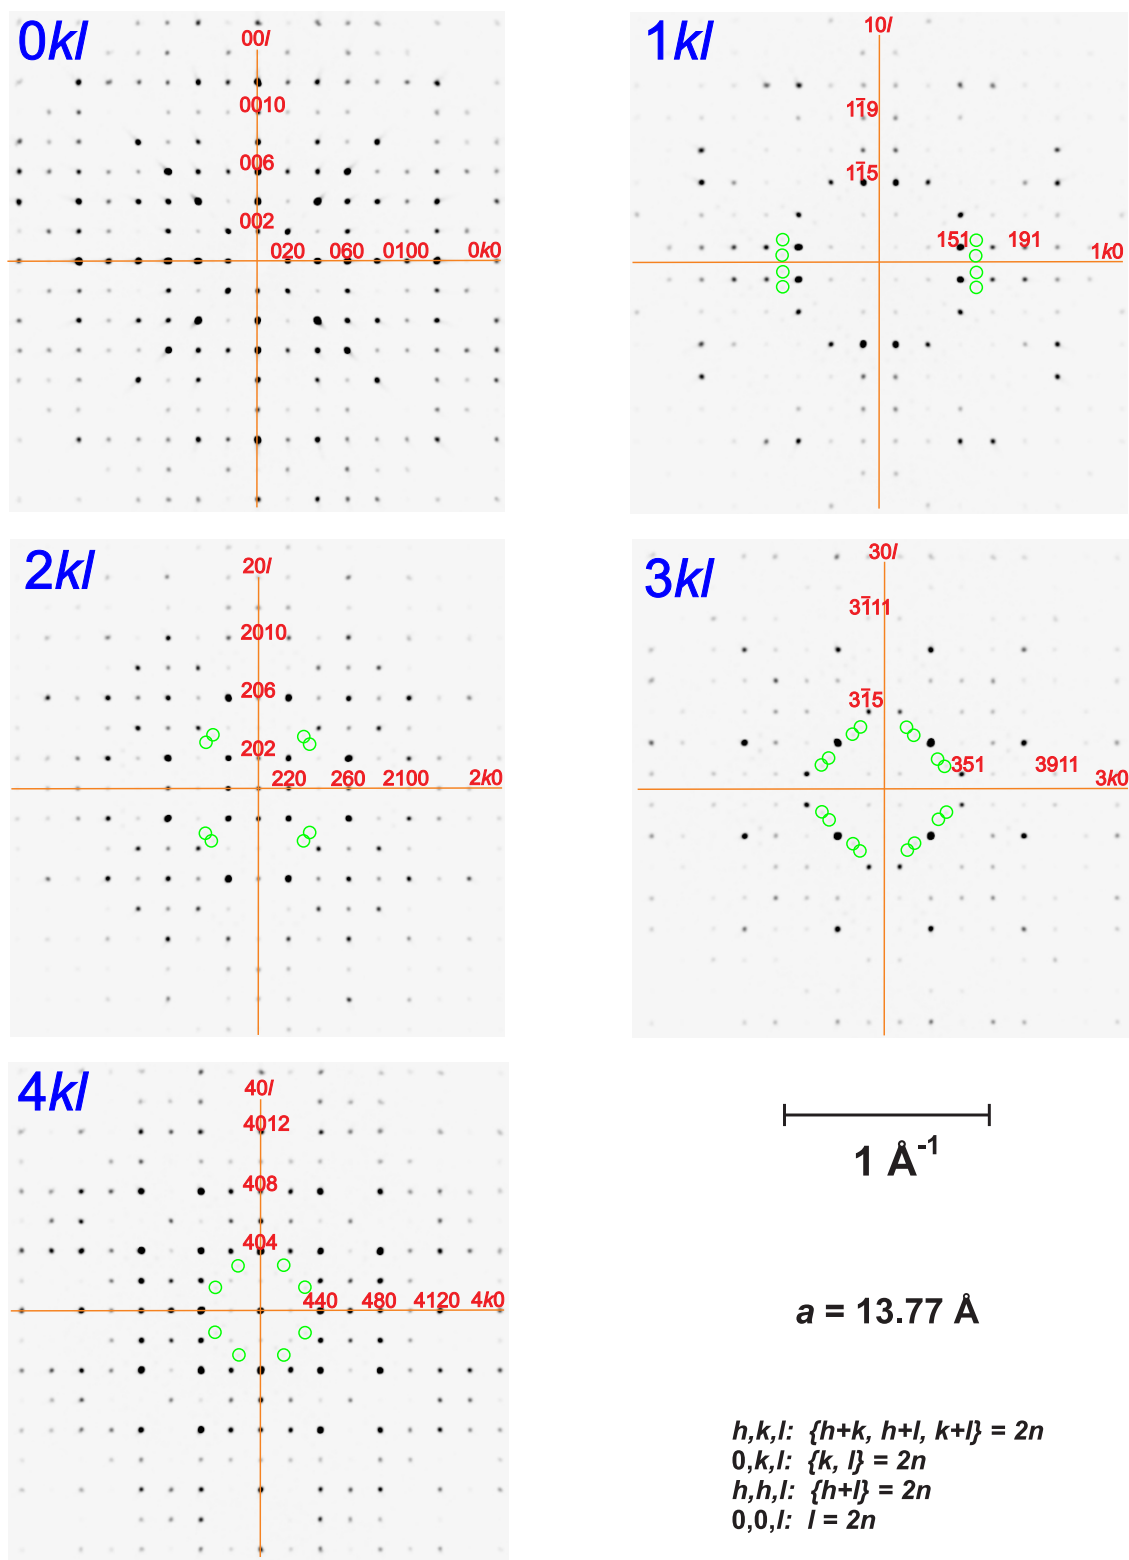

**Fig. S1** Selected unwarped pictures of the single crystal XRD pattern of  $\text{Y}_5\text{Ir}_6\text{Sn}_{18}$  proving the extinction group  $F\text{---}$ . Unsystematic weak satellite peaks breaking the given reflection conditions are marked with green circles.
